# Supplementary material for: Reduction in urinary excretion of neutrophil gelatinase-associated lipocalin by angiotensin receptor blockers in hypertensive patients
Source: PubMed Central journal article supplement — Nephrol Dial Transplant. 2009 May 27;24(8):2608–9. doi: 10.1093/ndt/gfp238 (PMC2711622; doi:10.1093/ndt/gfp238), 2009-05-27
Supplement: gfp238_1.pdf [file gfp238_1.pdf]

## Supplementary Table S1. Patients' demography

|             | Number | Ob | Ob+DM | DM | Male | Female | BP (before)    | BP (after)                                |
|-------------|--------|----|-------|----|------|--------|----------------|-------------------------------------------|
| Candesartan | 14     | 9  | 5     | 0  | 9    | 5      | 162 ± 4/96 ± 2 | 145 ± 3/87 ± 3                            |
| Olmesartan  | 7      | 6  | 1     | 0  | 3    | 4      | 153 ± 7/94 ± 4 | 138 ± 2/81 ± 2                            |
| Telmisartan | 5      | 0  | 3     | 2  | 3    | 2      | 155 ± 8/78 ± 5 | 144 ± 6/70 ± 5                            |
| Total       | 26     | 15 | 9     | 2  | 15   | 11     | 158 ± 3/92 ± 2 | 143 ± 2 <sup>a</sup> /82 ± 2 <sup>a</sup> |

Ob, obesity alone; DM, diabetes alone; Ob+DM, obesity plus diabetes. BP, blood pressure before and 3 months after angiotensin receptor blocker administration (mmHg). <sup>a</sup>P < 0.001 comparing before vs after.

**Supplementary Table S2.** Alteration of urinary Ngal (uNgal) and albumin (uAlb) levels after treatment with angiotensin receptor blocker (ARB)

|                               | uNgal/Cr ( $\mu\text{g/gCr}$ ) |                | uAlb/Cr ( $\text{mg/gCr}$ ) |               |            |            |
|-------------------------------|--------------------------------|----------------|-----------------------------|---------------|------------|------------|
|                               | before ARB                     | after ARB      | before ARB                  | after ARB     |            |            |
| Healthy control ( $n = 10$ )  | 8.6 $\pm$ 2.0                  |                | 33 $\pm$ 9                  |               |            |            |
| Normoalbuminuria ( $n = 14$ ) | 17.9 $\pm$ 4.2                 | 11.1 $\pm$ 3.0 | 11.5 $\pm$ 2.3              | 9.9 $\pm$ 2.9 |            |            |
| Microalbuminuria ( $n = 6$ )  | 15.7 $\pm$ 8.3                 | 13.0 $\pm$ 7.3 | 91 $\pm$ 31                 | 48 $\pm$ 24   |            |            |
| Macroalbuminuria ( $n = 6$ )  | 23.0 $\pm$ 6.1                 | 12.0 $\pm$ 3.4 | 688 $\pm$ 158               | 364 $\pm$ 126 |            |            |
| Total ( $n = 26$ )            | 18.5 $\pm$ 3.2                 | 11.8 $\pm$ 2.3 | 185 $\pm$ 65                | 100 $\pm$ 40  | $P < 0.05$ | $P < 0.01$ |

Patients were subdivided according to the extent of albuminuria. When geometric means (instead of means) were compared after log transformation for urinary ratios of Ngal/Cr and Albumin/Cr, they were again significantly reduced after the treatment ( $n = 26$ ,  $P < 0.05$ , respectively).
